# Supplementary material for: Responsive Au@polymer hybrid microgels for the simultaneous modulation and monitoring of Au-catalyzed chemical reaction
Source: Royal Society of Chemistry journal article supplement (doi:10.1039/c4ta00409d), 2014-01-01
Supplement: c4ta00409d1.pdf [file c4ta00409d1.pdf]

## Electronic Supplementary Information (ESI)

### Responsive Au@Polymer Hybrid Microgels for the Simultaneous Modulating and Monitoring of Au-Catalyzed Chemical Reaction

*Chuanfu Xiao, Qingshi Wu, Aiping Chang, Yahui Peng, Wenting Xu, and Weitai Wu\**

State Key Laboratory for Physical Chemistry of Solid Surfaces, and Department of Chemistry, College of Chemistry and Chemical Engineering, Xiamen University, Xiamen 361005, Fujian, China

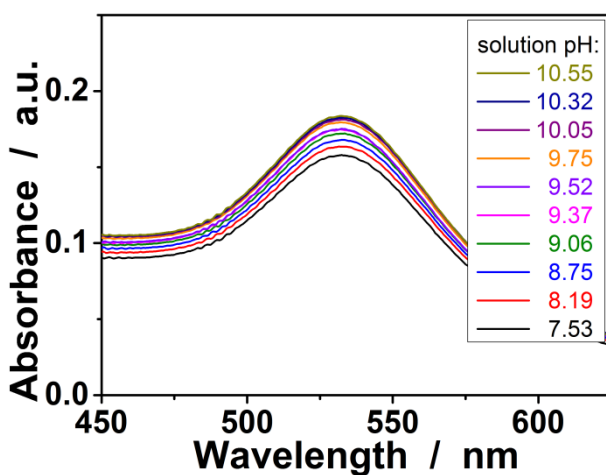

**Fig. S1** pH-dependent UV-vis spectra of Au@p(NIPAM-Am) hybrid microgels

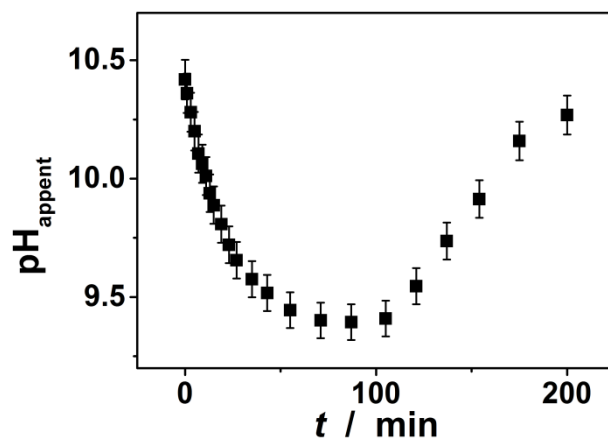

**Fig. S2** Changes in the local pH value (from the changes LSPR intensity) during the catalyzed reduction of  $\text{Fe}(\text{CN})_6^{3-}$  ions.

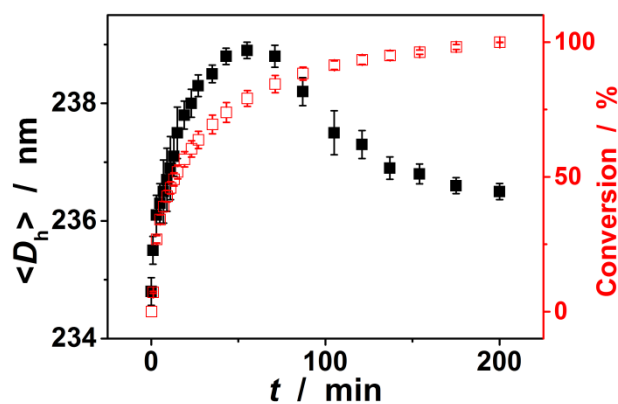

**Fig. S3** Changes in the  $\langle D_h \rangle$  of  $\text{Au}@p(\text{NIPAM-Am})$  hybrid microgels during the catalyzed reduction of  $\text{Fe}(\text{CN})_6^{3-}$  ions. Time-domain conversion measured with the  $\text{Fe}(\text{CN})_6^{3-}$  absorption is also presented for comparison.
